# Supplementary material for: Vesicular-Bound HLA-G as a Predictive Marker for Disease Progression in Epithelial Ovarian Cancer
Source: PubMed Central journal article supplement (PMC6721594; doi:10.3390/cancers11081106), 2019-08-02
Supplement: cancers-11-01106-s001.pdf [file cancers-11-01106-s001.pdf]

Supplementary Materials

## Vesicular-Bound HLA-G as a Predictive Marker for Disease Progression in Epithelial Ovarian Cancer

Esther Schwich, Vera Rebmann, Peter A. Horn, Alexander A. Celik, Christina Bade-Döding, Rainer Kimmig, Sabine Kasimir-Bauer, and Paul Buderath

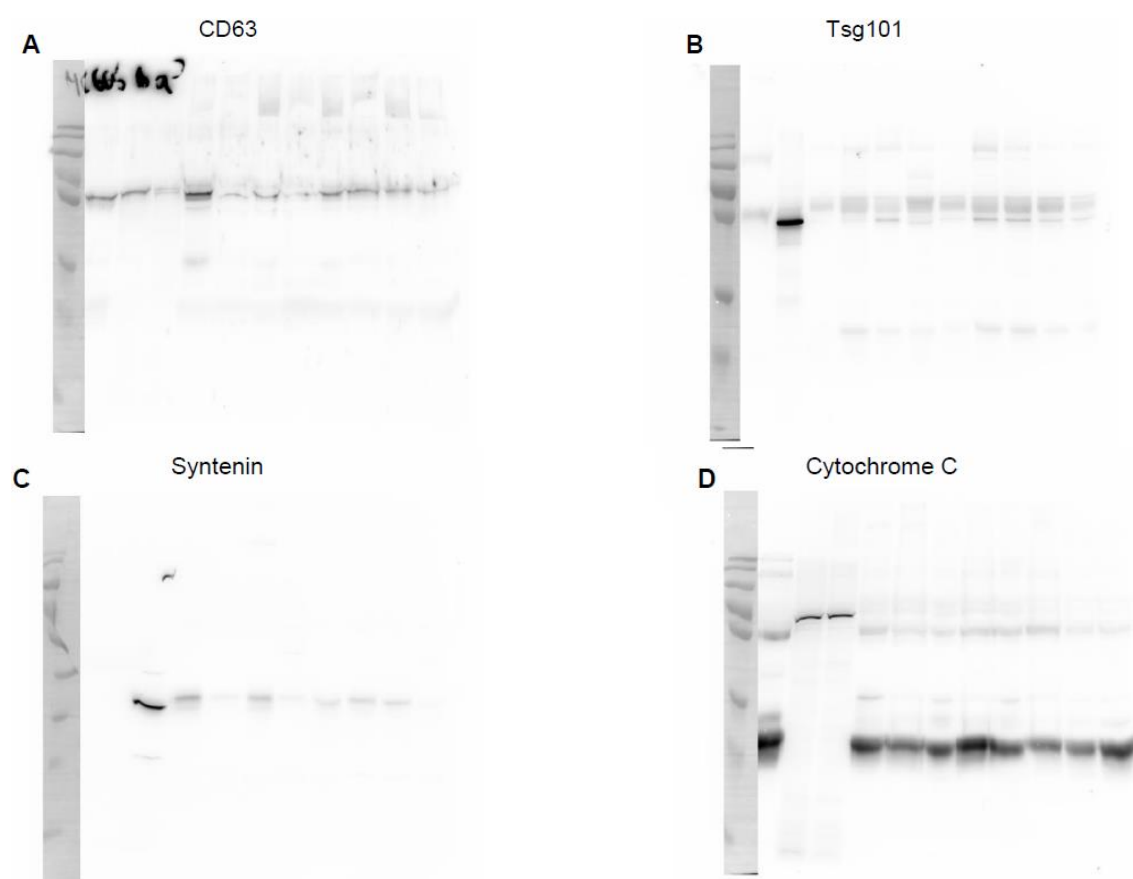

**Figure S1.** Characterization of EV preparations by western blot.

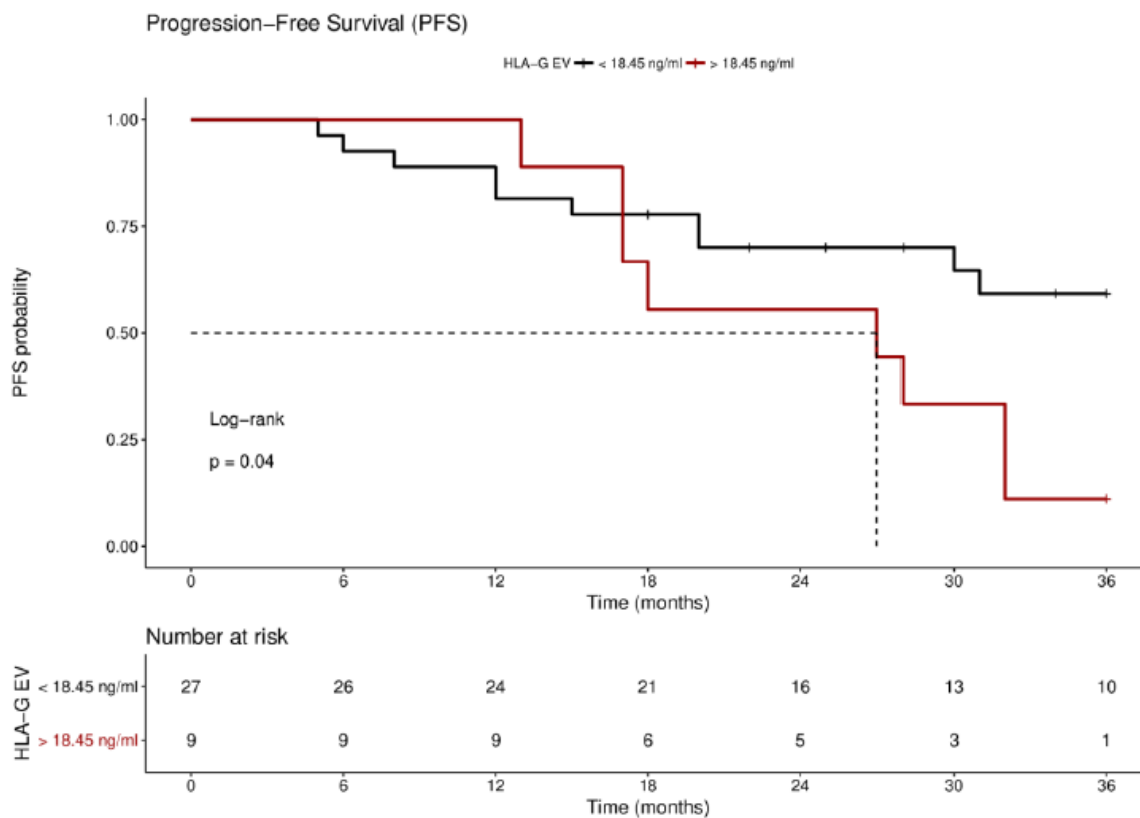

**Figure S2.** 3-year PFS Kaplan-Meier survival analysis regarding HLA-G<sub>EV</sub> status of patients without residual tumor burden.

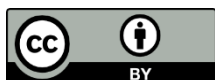

© 2019 by the authors. Licensee MDPI, Basel, Switzerland. This article is an open access article distributed under the terms and conditions of the Creative Commons Attribution (CC BY) license (<http://creativecommons.org/licenses/by/4.0/>).
